# Supplementary material for: Spatio-temporal changes in endosymbiont diversity and composition in the African cassava whitefly, Bemisia tabaci SSA1
Source: Frontiers journal article supplement (doi:10.3389/fmicb.2022.986226), 2022-11-18
Supplement: Table_1.XLSX [file Table_1.XLSX]

## Sheet: Sheet1
SampleId	Life stage	Genotype	Site name	Site	outbreaking Status	Date	Location x	Location y	TotalHaplo	Non-endosymbiont bacteria	Total Portiera	Total S-endosymbionts	PortieraHap_50	PortieraHap_49	PortieraHap_43	PortieraHap_44	PortieraHap_47	PortieraHap_46	PortieraHap_48	PortieraHap_45	PortieraHap_4	PortieraHap_5	PortieraHap_30	PortieraHap_29	PortieraHap_34	PortieraHap_31	PortieraHap_33	PortieraHap_32	PortieraHap_3	PortieraHap_1	PortieraHap_2	ArsenophonusHap_15	ArsenophonusHap_14	ArsenophonusHap_16	ArsenophonusHap_9	ArsenophonusHap_17	ArsenophonusHap_18	ArsenophonusHap_13	ArsenophonusHap_10	ArsenophonusHap_12	ArsenophonusHap_11	ArsenophonusHap_3	ArsenophonusHap_2	ArsenophonusHap_1	ArsenophonusHap_4	ArsenophonusHap_8	ArsenophonusHap_7	ArsenophonusHap_5	ArsenophonusHap_6
Recent Total										2004812	37623686	2547192
sample-31	adult	SSA1-SG1	Kireku	f1	outbreaking	Recent	N00.43564	E032.04041	2	836	683726	16206	0	0	0	0	0	0	0	0	225693	153995	90389	129223	31876	20957	19237	12356	0	0	0	0	0	0	0	12424	3782	0	0	0	0	0	0	0	0	0	0	0	0
sample-32	adult	SSA1-SG2	Kireku	f1	outbreaking	Recent	N00.43564	E032.04041	16	7762	700807	241570	0	0	0	0	0	0	0	0	164349	218869	120126	92826	38481	21195	28645	16316	0	0	0	12792	16499	7568	9199	0	0	2075	1250	1854	1081	0	0	0	0	0	0	0	0
sample-45	adult	SSA1-SG2	Kireku	f1	outbreaking	Recent	N00.43564	E032.04041	13	253	699030	131277	0	0	0	0	0	0	0	0	55468	48199	171673	363054	18357	17044	8920	16315	0	0	0	248	81	1538	254	0	0	55	0	0	0	0	0	0	0	0	0	0	0
sample-60	adult	SSA1-SG2	Kireku	f1	outbreaking	Recent	N00.43564	E032.04041	21	10723	1475766	259467	0	0	0	0	0	0	0	0	354412	382701	216216	193777	112469	58694	104065	53432	0	0	0	20925	22217	11516	12771	0	0	5772	2883	5695	2870	137	435	201	0	74	77	0	0
sample-93	adult	SSA1-SG2	Kireku	f1	outbreaking	Recent	N00.43564	E032.04041	8	15593	698345	33500	0	0	0	0	0	0	0	0	188703	103179	111706	206276	22424	22670	22681	20706	0	0	0	0	0	0	0	0	0	0	0	0	0	0	0	0	0	0	0	0	0
sample-143	adult	SSA1-SG1	Nabigasa	f10	Non-outbreaking	Recent	S00.89538	E031.44637	5	997	947024	10550	0	0	0	0	0	0	0	0	274648	239807	164395	181599	24276	16782	28020	17497	0	0	0	0	0	0	0	7276	2921	0	0	0	0	0	0	0	0	0	0	0	0
sample-49	adult	SSA1-SG1	Nabigasa	f10	Non-outbreaking	Recent	S00.89538	E031.44637	2	154317	168510	1362	0	0	0	0	0	0	0	0	34416	33539	23007	23153	21085	14197	11321	7792	0	0	0	0	0	0	0	934	428	0	0	0	0	0	0	0	0	0	0	0	0
sample-62	adult	SSA1-SG1	Nabigasa	f10	Non-outbreaking	Recent	S00.89538	E031.44637	1	12953	908195	448	0	0	0	0	0	0	0	0	305686	132985	74492	194539	72511	35420	58117	34445	0	0	0	0	0	0	0	448	0	0	0	0	0	0	0	0	0	0	0	0	0
sample-77	adult	SSA1-SG1	Nabigasa	f10	Non-outbreaking	Recent	S00.89538	E031.44637	1	4423	1197600	645	0	0	0	0	0	0	0	0	362385	393918	133874	131009	94822	24453	44627	12512	0	0	0	0	0	0	0	645	0	0	0	0	0	0	0	0	0	0	0	0	0
sample-102	adult	SSA1-SG2	Nabigasa	f10	Non-outbreaking	Recent	S00.89538	E031.44637	16	204505	452510	123157	0	0	0	0	0	0	0	0	107326	150319	75213	53842	22916	11220	21128	10546	0	0	0	8435	11902	4548	6438	0	0	1522	674	1293	657	0	0	0	0	0	0	0	0
sample-171	adult	SSA1-SG2	Nabigasa	f10	Non-outbreaking	Recent	S00.89538	E031.44637	16	7953	857153	219207	0	0	0	0	0	0	0	0	285202	206620	116494	165960	25759	14593	26693	15832	0	0	0	36803	22958	22077	13234	0	0	2225	1241	2835	1880	0	0	0	0	0	0	0	0
sample-7	adult	SSA1-SG2	Nabigasa	f10	Non-outbreaking	Recent	S00.89538	E031.44637	16	25137	1119141	39791	0	0	0	0	0	0	0	0	237058	248467	208709	199943	83278	65424	41983	34279	0	0	0	2314	1689	1667	1255	0	0	333	127	80	56	0	0	0	0	0	0	0	0
sample-76	adult	SSA1-SG2	Nabigasa	f10	Non-outbreaking	Recent	S00.89538	E031.44637	14	8673	1357754	140166	7153	43339	12571	68900	1599	5370	9753	961	549236	294478	61672	162796	63554	11292	48479	16601	0	0	0	0	0	0	0	0	0	0	0	0	0	0	0	0	0	0	0	0	0
sample-129	adult	SSA1-SG1	Agasamvu	f11	outbreaking	Recent	S00.98063	E031.41873	2	195728	1354102	9314	0	0	0	0	0	0	0	0	465065	451398	163632	138540	50534	18823	53023	13087	0	0	0	0	0	0	0	6210	3104	0	0	0	0	0	0	0	0	0	0	0	0
sample-199	adult	SSA1-SG1	Agasamvu	f11	outbreaking	Recent	S00.98063	E031.41873	2	222148	334006	11714	0	0	0	0	0	0	0	0	80713	72361	58798	64406	21364	17466	10581	8317	0	0	0	0	0	0	0	7335	4379	0	0	0	0	0	0	0	0	0	0	0	0
sample-35	adult	SSA1-SG1	Agasamvu	f11	outbreaking	Recent	S00.98063	E031.41873	9	201992	123740	7208	0	0	0	0	0	0	0	0	27606	27443	15514	15932	15825	8731	8165	4524	0	0	0	0	0	0	0	4127	1846	0	0	0	0	142	394	438	129	72	0	39	0
sample-138	adult	SSA1-SG1	Agasamvu	f11	outbreaking	Recent	S00.98063	E031.41873	0	21115	892408	0	0	0	0	0	0	0	0	0	272081	289138	87007	102671	77326	17540	35313	11332	0	0	0	0	0	0	0	0	0	0	0	0	0	0	0	0	0	0	0	0	0
sample-115	adult	SSA1-SG2	Agasamvu	f11	outbreaking	Recent	S00.98063	E031.41873	9	853	288554	80950	0	0	0	0	0	0	0	0	52213	77396	82824	56737	6537	7579	2463	2805	0	0	0	0	0	0	0	68	0	0	0	0	0	0	0	0	0	0	0	0	0
sample-158	adult	SSA1-SG2	Agasamvu	f11	outbreaking	Recent	S00.98063	E031.41873	16	6772	394721	93442	0	0	0	0	0	0	0	0	77166	104750	72084	52745	33484	22789	18999	12704	0	0	0	7536	9506	5210	6711	0	0	2944	1967	1692	1245	0	0	0	0	0	0	0	0
sample-185	adult	SSA1-SG2	Agasamvu	f11	outbreaking	Recent	S00.98063	E031.41873	16	2384	851509	197851	0	0	0	0	0	0	0	0	318064	227682	82449	132744	30688	9729	34170	15983	0	0	0	24782	15576	11786	6266	0	0	1232	387	1456	643	0	0	0	0	0	0	0	0
sample-91	adult	SSA1-SG2	Agasamvu	f11	outbreaking	Recent	S00.98063	E031.41873	8	1104	755614	95758	0	0	0	0	0	0	0	0	155680	164682	190458	181420	19490	20882	10973	12029	0	0	0	0	0	0	0	0	0	0	0	0	0	0	0	0	0	0	0	0	0
sample-63	adult	SSA1-SG2	Agasamvu	f11	outbreaking	Recent	S00.98063	E031.41873	16	1380	999494	55368	0	0	0	0	0	0	0	0	298405	262725	161801	192274	33802	20097	18806	11584	0	0	0	6634	5472	4311	3434	0	0	260	122	136	48	0	0	0	0	0	0	0	0
sample-33L2	adult	SSA1-SG1	Ntale	f12	outbreaking	Recent	S00.12179	E031.75773	16	2918	232477	18481	0	0	0	0	0	0	0	0	57056	59150	39159	38611	15705	10186	7555	5055	0	0	0	796	844	572	557	0	0	150	92	61	43	0	0	0	0	0	0	0	0
sample-34L2	adult	SSA1-SG1	Ntale	f12	outbreaking	Recent	S00.12179	E031.75773	2	34759	961256	6008	0	0	0	0	0	0	0	0	252903	179038	101411	143549	122861	68999	59588	32907	0	0	0	0	0	0	0	4391	1617	0	0	0	0	0	0	0	0	0	0	0	0
sample-172	adult	SSA1-SG1	Ntale	f12	outbreaking	Recent	S00.12179	E031.75773	2	346774	1339990	12452	0	0	0	0	0	0	0	0	275813	370430	220150	160707	122538	71227	76164	42961	0	0	0	0	0	0	0	7306	5146	0	0	0	0	0	0	0	0	0	0	0	0
sample-21	adult	SSA1-SG1	Ntale	f12	outbreaking	Recent	S00.12179	E031.75773	2	57162	854769	3067	0	0	0	0	0	0	0	0	248617	249853	69293	70269	107882	37986	52747	18122	0	0	0	0	0	0	0	2105	962	0	0	0	0	0	0	0	0	0	0	0	0
sample-34L1	adult	SSA1-SG1	Ntale	f12	outbreaking	Recent	S00.12179	E031.75773	2	26566	290936	3642	0	0	0	0	0	0	0	0	111470	50518	25896	58953	9140	4584	19767	10608	0	0	0	0	0	0	0	3007	635	0	0	0	0	0	0	0	0	0	0	0	0
sample-48	adult	SSA1-SG1	Ntale	f12	outbreaking	Recent	S00.12179	E031.75773	2	30560	802493	12991	0	0	0	0	0	0	0	0	190091	131411	103751	149014	85679	62465	44143	35939	0	0	0	0	0	0	0	9404	3587	0	0	0	0	0	0	0	0	0	0	0	0
sample-159L2	adult	SSA1-SG1	Ntale	f12	outbreaking	Recent	S00.12179	E031.75773	17	1851	452726	35954	0	0	0	0	0	0	0	0	9399	9050	152691	156689	4512	74898	2471	43016	0	0	0	134	117	4605	3899	0	0	45	1893	0	602	64	0	0	207	0	0	0	0
sample-0123	adult	SSA1-SG1	Ntale	f12	outbreaking	Recent	S00.12179	E031.75773	0	0	0	0	0	0	0	0	0	0	0	0	0	0	0	0	0	0	0	0	0	0	0	0	0	0	0	0	0	0	0	0	0	0	0	0	0	0	0	0	0
sample-33L1	adult	SSA1-SG2	Ntale	f12	outbreaking	Recent	S00.12179	E031.75773	18	1340	308455	20041	0	0	0	0	0	0	0	0	92848	58094	27516	43560	29843	15463	26999	14132	0	0	0	276	160	138	77	1766	464	89	42	86	36	0	0	0	0	0	0	0	0
sample-79L1	adult	SSA1-SG2	Ntale	f12	outbreaking	Recent	S00.12179	E031.75773	1	1370	252812	10	0	0	0	0	0	0	0	0	71979	41767	30830	53044	19677	15958	10839	8718	0	0	0	0	0	0	0	0	0	0	0	0	0	0	0	0	0	0	0	0	0
sample-157	adult	SSA1-SG1	Wasinda	f13	outbreaking	Recent	N00.17379	E031.92822	6	2436	899234	5228	0	0	0	0	0	0	0	0	168203	104007	206196	237295	14064	88955	23558	56956	0	0	0	0	0	196	270	2923	1027	0	0	0	0	0	0	0	0	0	0	0	0
sample-47L1	adult	SSA1-SG1	Wasinda	f13	outbreaking	Recent	N00.17379	E031.92822	16	2869	345697	94271	0	0	0	0	0	0	0	0	15666	11871	117475	155445	1969	18814	2220	22237	0	0	0	1086	875	10923	8058	0	0	56	588	65	756	0	0	0	0	0	0	0	0
sample-75L2	adult	SSA1-SG1	Wasinda	f13	outbreaking	Recent	N00.17379	E031.92822	8	82224	894758	10851	0	0	0	0	0	0	0	0	298089	374437	67851	54032	58146	10645	26662	4896	0	0	0	0	0	0	0	0	0	0	0	0	0	0	0	0	0	0	0	0	0
sample-0205	adult	SSA1-SG1	Wasinda	f13	outbreaking	Recent	N00.17379	E031.92822	0	0	0	0	0	0	0	0	0	0	0	0	0	0	0	0	0	0	0	0	0	0	0	0	0	0	0	0	0	0	0	0	0	0	0	0	0	0	0	0	0
sample-75L1	adult	SSA1-SG2	Wasinda	f13	outbreaking	Recent	N00.17379	E031.92822	2	169	307629	1080	0	0	0	0	0	0	0	0	83040	49182	35249	60662	21980	17422	22219	17875	0	0	0	0	0	0	0	870	210	0	0	0	0	0	0	0	0	0	0	0	0
sample-47L2	adult	SSA1-SG2	Wasinda	f13	outbreaking	Recent	N00.17379	E031.92822	0	1263	218492	0	0	0	0	0	0	0	0	0	48626	51213	41635	39502	13761	11266	6921	5568	0	0	0	0	0	0	0	0	0	0	0	0	0	0	0	0	0	0	0	0	0
sample-186	adult	SSA1-SG2	Wasinda	f13	outbreaking	Recent	N00.17379	E031.92822	16	11586	750280	274353	0	0	0	0	0	0	0	0	188457	231758	87436	67426	76393	29553	51716	17541	0	0	0	8916	9979	3350	3734	0	0	3134	1109	1665	452	0	0	0	0	0	0	0	0
sample-19	adult	SSA1-SG2	Wasinda	f13	outbreaking	Recent	N00.17379	E031.92822	13	6234	513390	27708	0	0	0	0	0	0	0	0	201758	144590	58295	67187	16639	7121	14024	3776	0	0	0	1692	1395	380	339	0	0	115	0	0	0	0	0	0	0	0	0	0	0
sample-109L2	adult	SSA1-SG1	Kyanagolo	f5	Non-outbreaking	Recent	S00.16989	E031.83412	2	15878	530281	13119	0	0	0	0	0	0	0	0	117462	135590	68913	59675	61437	30602	37582	19020	0	0	0	0	0	0	0	8241	4878	0	0	0	0	0	0	0	0	0	0	0	0
sample-23L2	adult	SSA1-SG1	Kyanagolo	f5	Non-outbreaking	Recent	S00.16989	E031.83412	1	2594	221178	177	0	0	0	0	0	0	0	0	55144	32919	17447	29662	27329	15014	28362	15301	0	0	0	0	0	0	0	177	0	0	0	0	0	0	0	0	0	0	0	0	0
sample-23L1	adult	SSA1-SG1	Kyanagolo	f5	Non-outbreaking	Recent	S00.16989	E031.83412	0	3033	255343	0	0	0	0	0	0	0	0	0	111381	67812	7707	12266	32348	4571	16867	2391	0	0	0	0	0	0	0	0	0	0	0	0	0	0	0	0	0	0	0	0	0
sample-51	adult	SSA1-SG1	Kyanagolo	f5	Non-outbreaking	Recent	S00.16989	E031.83412	2	46874	1362953	253	0	0	0	0	0	0	0	0	297733	138471	246664	391358	51753	90879	75923	70172	0	0	0	0	0	0	0	135	118	0	0	0	0	0	0	0	0	0	0	0	0
sample-9	adult	SSA1-SG1	Kyanagolo	f5	Non-outbreaking	Recent	S00.16989	E031.83412	3	5192	909361	398	0	0	0	0	0	0	0	0	297402	142892	117502	243831	22708	17758	38676	28592	0	0	0	0	0	0	0	0	0	0	0	0	0	0	0	0	0	0	0	0	0
sample-17	adult	SSA1-SG1	Masaka	f6	Non-outbreaking	Recent	S00.33294	E031.70984	2	40638	476935	7582	0	0	0	0	0	0	0	0	136845	132525	49046	44014	52821	23521	27188	10975	0	0	0	0	0	0	0	4985	2597	0	0	0	0	0	0	0	0	0	0	0	0
sample-78	adult	SSA1-SG1	Masaka	f6	Non-outbreaking	Recent	S00.33294	E031.70984	2	4249	1044940	5257	0	0	0	0	0	0	0	0	328919	317866	121789	127881	73220	18358	45667	11240	0	0	0	0	0	0	0	3838	1419	0	0	0	0	0	0	0	0	0	0	0	0
sample-8	adult	SSA1-SG1	Masaka	f6	Non-outbreaking	Recent	S00.33294	E031.70984	7	3931	1206229	4094	0	0	0	0	0	0	0	0	278729	285870	252891	247984	51080	42385	25839	21451	0	0	0	0	0	0	0	2200	946	0	0	0	0	0	0	0	0	0	0	0	0
sample-38	adult	SSA1-SG1	Masaka	f6	Non-outbreaking	Recent	S00.33294	E031.70984	0	52417	777	0	0	0	0	0	0	0	0	0	421	257	0	99	0	0	0	0	0	0	0	0	0	0	0	0	0	0	0	0	0	0	0	0	0	0	0	0	0
sample-105L2	adult	SSA1-SG2	Masaka	f6	Non-outbreaking	Recent	S00.33294	E031.70984	2	3811	66692	1746	0	0	0	0	0	0	0	0	16130	19143	9399	7567	7353	3398	2493	1209	0	0	0	0	0	0	0	1101	645	0	0	0	0	0	0	0	0	0	0	0	0
sample-36	adult	SSA1-SG2	Masaka	f6	Non-outbreaking	Recent	S00.33294	E031.70984	13	3877	691317	8859	0	0	0	0	0	0	0	0	196737	189071	105795	115811	33208	19463	19487	11745	0	0	0	817	758	159	182	0	0	74	0	0	0	0	0	0	0	0	0	0	0
sample-92	adult	SSA1-SG2	Masaka	f6	Non-outbreaking	Recent	S00.33294	E031.70984	21	54785	531993	203249	0	0	0	0	0	0	0	0	97633	110317	124215	107545	29879	26944	19111	16349	0	0	0	5712	6082	5780	6530	0	61	1720	1297	1199	938	0	0	0	0	0	0	0	0
sample-52	adult	SSA1-SG1	Kiwesi	f8	Non-outbreaking	Recent	S00.66515	E031.53927	1	4635	402370	136	0	0	0	0	0	0	0	0	15820	24143	196674	132325	2816	21269	1065	8258	0	0	0	0	0	0	0	0	136	0	0	0	0	0	0	0	0	0	0	0	0
sample-117	adult	SSA1-SG1	Kiwesi	f8	Non-outbreaking	Recent	S00.66515	E031.53927	2	9760	1503067	917	0	0	0	0	0	0	0	0	370325	302487	232875	279870	97245	72195	84924	63146	0	0	0	0	0	0	0	754	163	0	0	0	0	0	0	0	0	0	0	0	0
sample-200	adult	SSA1-SG1	Kiwesi	f8	Non-outbreaking	Recent	S00.66515	E031.53927	2	26497	1150761	4561	0	0	0	0	0	0	0	0	230455	268315	205016	178752	83232	63547	68433	53011	0	0	0	0	0	0	0	2924	1637	0	0	0	0	0	0	0	0	0	0	0	0
sample-53L2	adult	SSA1-SG2	Kiwesi	f8	Non-outbreaking	Recent	S00.66515	E031.53927	2	8959	584386	1756	0	0	0	0	0	0	0	0	114977	165247	101298	70605	53921	32705	28361	17272	0	0	0	0	0	0	0	861	895	0	0	0	0	0	0	0	0	0	0	0	0
Old Total										4585643	54731918	1000745
sample-0207	Pupae	SSA1-SG1	Kireku	f1	outbreaking	Old	N00.43564	E032.04041	0	0	0	0	0	0	0	0	0	0	0	0	0	0	0	0	0	0	0	0	0	0	0	0	0	0	0	0	0	0	0	0	0	0	0	0	0	0	0	0	0
sample-179	Pupae	SSA1-SG1	Kireku	f1	outbreaking	Old	N00.43564	E032.04041	2	2282	557146	25757	0	0	0	0	0	0	0	0	133486	177726	89461	68336	35504	17894	22829	11910	0	0	0	0	0	0	0	15422	10335	0	0	0	0	0	0	0	0	0	0	0	0
sample-192	Pupae	SSA1-SG1	Kireku	f1	outbreaking	Old	N00.43564	E032.04041	2	1172229	809472	1605	0	0	0	0	0	0	0	0	245697	185978	26569	34857	151030	21376	125716	18249	0	0	0	0	0	0	0	1124	481	0	0	0	0	0	0	0	0	0	0	0	0
sample-166	Pupae	SSA1-SG1	Kireku	f1	outbreaking	Old	N00.43564	E032.04041	2	6994	1531987	29776	0	0	0	0	0	0	0	0	122664	142304	452747	572035	38871	88136	19103	96127	0	0	0	0	0	0	0	20518	9258	0	0	0	0	0	0	0	0	0	0	0	0
sample-124	nymph	SSA1-SG1	Kireku	f1	outbreaking	Old	N00.43564	E032.04041	2	31433	458479	7688	0	0	0	0	0	0	0	0	114960	79874	88851	126924	8733	10588	13103	15446	0	0	0	0	0	0	0	5818	1870	0	0	0	0	0	0	0	0	0	0	0	0
sample-151	nymph	SSA1-SG1	Kireku	f1	outbreaking	Old	N00.43564	E032.04041	2	320	286777	5273	0	0	0	0	0	0	0	0	68413	63787	43116	46291	18807	12844	19057	13061	0	648	753	0	0	0	0	3579	1694	0	0	0	0	0	0	0	0	0	0	0	0
sample-193	nymph	SSA1-SG1	Kireku	f1	outbreaking	Old	N00.43564	E032.04041	2	2073	1567738	2102	0	0	0	0	0	0	0	0	477007	603937	88725	70025	185811	26496	101066	14671	0	0	0	0	0	0	0	1349	753	0	0	0	0	0	0	0	0	0	0	0	0
sample-0179	nymph	SSA1-SG1	Kireku	f1	outbreaking	Old	N00.43564	E032.04041	0	0	0	0	0	0	0	0	0	0	0	0	0	0	0	0	0	0	0	0	0	0	0	0	0	0	0	0	0	0	0	0	0	0	0	0	0	0	0	0	0
sample-194	nymph	SSA1-SG1	Kireku	f1	outbreaking	Old	N00.43564	E032.04041	2	11003	871856	25941	0	0	0	0	0	0	0	0	283265	265213	93640	82846	62333	32149	37513	14897	0	0	0	0	0	0	0	17507	8434	0	0	0	0	0	0	0	0	0	0	0	0
sample-207	nymph	SSA1-SG1	Kireku	f1	outbreaking	Old	N00.43564	E032.04041	2	4099	1461258	9893	0	0	0	0	0	0	0	0	312027	376862	281881	228720	87983	64585	63734	45466	0	0	0	0	0	0	0	6560	3333	0	0	0	0	0	0	0	0	0	0	0	0
sample-208	nymph	SSA1-SG1	Kireku	f1	outbreaking	Old	N00.43564	E032.04041	2	873	364696	11003	0	0	0	0	0	0	0	0	114970	73445	59865	94999	3138	2583	8517	7179	0	0	0	0	0	0	0	8600	2403	0	0	0	0	0	0	0	0	0	0	0	0
sample-165	nymph	SSA1-SG1	Kireku	f1	outbreaking	Old	N00.43564	E032.04041	2	514	1485376	30221	0	0	0	0	0	0	0	0	358101	338339	224707	237843	96437	64538	99061	66350	0	0	0	0	0	0	0	20530	9691	0	0	0	0	0	0	0	0	0	0	0	0
sample-178	nymph	SSA1-SG1	Kireku	f1	outbreaking	Old	N00.43564	E032.04041	10	993398	931338	16962	0	0	0	0	0	0	0	0	224067	176503	88461	113018	121103	60630	98217	49339	0	0	0	0	0	0	0	5883	2474	0	0	0	0	986	2100	1705	773	1136	913	533	459
sample-206	nymph	SSA1-SG1	Kireku	f1	outbreaking	Old	N00.43564	E032.04041	2	311624	126342	1774	0	0	0	0	0	0	0	0	25862	19862	15526	20786	13731	10812	11042	8721	0	0	0	0	0	0	0	1260	514	0	0	0	0	0	0	0	0	0	0	0	0
sample-123	egg	SSA1-SG1	Nabigasa	f10	Non-outbreaking	Old	S00.89538	E031.44637	1	4189	483703	363	0	0	0	0	0	0	0	0	140653	100163	91977	127557	4945	4950	6876	6582	0	0	0	0	0	0	0	363	0	0	0	0	0	0	0	0	0	0	0	0	0
sample-109L1	egg	SSA1-SG1	Agasamvu	f11	outbreaking	Old	S00.98063	E031.41873	16	51	216670	29855	0	0	0	0	0	0	0	0	59345	57770	27359	28233	15110	7216	14653	6984	0	0	0	2073	1916	1069	978	0	0	256	112	241	107	0	0	0	0	0	0	0	0
sample-137L2	nymph	SSA1-SG1	Ntale	f12	outbreaking	Old	S00.12179	E031.75773	2	47963	1509550	13607	0	0	0	0	0	0	0	0	294010	525976	345635	194025	59821	38821	31179	20083	0	0	0	0	0	0	0	6956	6651	0	0	0	0	0	0	0	0	0	0	0	0
sample-105L1	egg	SSA1-SG1	Ntale	f12	outbreaking	Old	S00.12179	E031.75773	0	9021	304515	0	0	0	0	0	0	0	0	0	71832	73996	48165	47152	25799	17125	12510	7936	0	0	0	0	0	0	0	0	0	0	0	0	0	0	0	0	0	0	0	0	0
sample-162	egg	SSA1-SG1	Ntale	f12	outbreaking	Old	S00.12179	E031.75773	2	30489	1122667	4510	0	0	0	0	0	0	0	0	238974	277060	173878	151337	123488	76922	49659	31349	0	0	0	0	0	0	0	2915	1595	0	0	0	0	0	0	0	0	0	0	0	0
sample-96	egg	SSA1-SG1	Ntale	f12	outbreaking	Old	S00.12179	E031.75773	6	39859	946114	14205	0	0	0	0	0	0	0	0	251951	163016	140226	218021	36452	31323	56397	48728	0	0	0	0	0	0	0	9744	3429	0	0	0	0	0	0	0	0	0	0	0	0
sample-164	egg	SSA1-SG1	Ntale	f12	outbreaking	Old	S00.12179	E031.75773	2	99303	943270	19101	0	0	0	0	0	0	0	0	221932	288563	180984	139347	46726	29087	22652	13979	0	0	0	0	0	0	0	11588	7513	0	0	0	0	0	0	0	0	0	0	0	0
sample-191	Pupae	SSA1-SG1	Wasinda	f13	outbreaking	Old	N00.17379	E031.92822	2	761	271158	2244	0	0	0	0	0	0	0	0	72943	48552	26074	38910	36269	20169	17938	10303	0	0	0	0	0	0	0	1748	496	0	0	0	0	0	0	0	0	0	0	0	0
sample-177	Pupae	SSA1-SG1	Wasinda	f13	outbreaking	Old	N00.17379	E031.92822	1	0	59640	1747	0	0	0	0	0	0	0	0	23016	7509	4111	13228	1237	689	6272	3578	0	0	0	0	0	0	0	1747	0	0	0	0	0	0	0	0	0	0	0	0	0
sample-108	Pupae	SSA1-SG1	Wasinda	f13	outbreaking	Old	N00.17379	E031.92822	2	226	665789	7109	0	0	0	0	0	0	0	0	179163	177630	91765	95662	43641	23378	35338	19212	0	0	0	0	0	0	0	4779	2330	0	0	0	0	0	0	0	0	0	0	0	0
sample-136	nymph	SSA1-SG1	Wasinda	f13	outbreaking	Old	N00.17379	E031.92822	2	49547	55117	30137	0	0	0	0	0	0	0	0	17308	20111	4445	4334	4338	1524	2041	1016	0	0	0	0	0	0	0	19285	10852	0	0	0	0	0	0	0	0	0	0	0	0
sample-163	nymph	SSA1-SG1	Wasinda	f13	outbreaking	Old	N00.17379	E031.92822	2	48614	845654	23382	0	0	0	0	0	0	0	0	323391	165103	105212	206714	18158	11114	9909	6053	0	0	0	0	0	0	0	18436	4946	0	0	0	0	0	0	0	0	0	0	0	0
sample-135	nymph	SSA1-SG1	Wasinda	f13	outbreaking	Old	N00.17379	E031.92822	0	5558	2112508	0	0	0	0	0	0	0	0	0	921785	328427	107665	440802	102736	23696	124287	63110	0	0	0	0	0	0	0	0	0	0	0	0	0	0	0	0	0	0	0	0	0
sample-146	nymph	SSA1-SG1	Wasinda	f13	outbreaking	Old	N00.17379	E031.92822	2	3122	475899	4094	0	0	0	0	0	0	0	0	151417	70326	38814	82921	33051	21011	50344	28015	0	0	0	0	0	0	0	3428	666	0	0	0	0	0	0	0	0	0	0	0	0
sample-121	nymph	SSA1-SG1	Wasinda	f13	outbreaking	Old	N00.17379	E031.92822	0	1079	599439	0	0	0	0	0	0	0	0	0	189685	104205	89897	165603	15894	13690	10721	9744	0	0	0	0	0	0	0	0	0	0	0	0	0	0	0	0	0	0	0	0	0
sample-149	nymph	SSA1-SG1	Wasinda	f13	outbreaking	Old	N00.17379	E031.92822	0	4286	2312991	0	0	0	0	0	0	0	0	0	885987	249645	162445	624219	104147	59967	135271	91310	0	0	0	0	0	0	0	0	0	0	0	0	0	0	0	0	0	0	0	0	0
sample-150	nymph	SSA1-SG1	Wasinda	f13	outbreaking	Old	N00.17379	E031.92822	2	12984	1219040	80825	0	0	0	0	0	0	0	0	289701	302134	167103	169393	102653	64563	74754	48739	0	0	0	0	0	0	0	53643	27182	0	0	0	0	0	0	0	0	0	0	0	0
sample-152	nymph	SSA1-SG1	Wasinda	f13	outbreaking	Old	N00.17379	E031.92822	18	12290	222639	59308	0	0	0	0	0	0	0	0	48744	43970	26861	30721	29570	17926	15397	9450	0	0	0	1320	620	899	387	28993	9693	1219	837	278	161	0	0	0	0	0	0	0	0
sample-40	egg	SSA1-SG1	Kyanagolo	f5	Non-outbreaking	Old	S00.16989	E031.83412	2	7183	1157580	11459	0	0	0	0	0	0	0	0	366154	287323	161081	213698	41972	22197	41355	23800	0	0	0	0	0	0	0	8634	2825	0	0	0	0	0	0	0	0	0	0	0	0
sample-104	egg	SSA1-SG1	Kyanagolo	f5	Non-outbreaking	Old	S00.16989	E031.83412	2	9079	810419	8177	0	0	0	0	0	0	0	0	234648	139356	75303	128830	93354	50166	57541	31221	0	0	0	0	0	0	0	6368	1809	0	0	0	0	0	0	0	0	0	0	0	0
sample-122	egg	SSA1-SG1	Kyanagolo	f5	Non-outbreaking	Old	S00.16989	E031.83412	10	19557	1305844	34486	0	0	0	0	0	0	0	0	192113	150528	194869	251215	126011	162444	98957	129707	0	0	0	0	0	0	0	10460	4550	0	0	0	0	6587	5708	3027	3404	96	238	148	268
sample-147	egg	SSA1-SG1	Kyanagolo	f5	Non-outbreaking	Old	S00.16989	E031.83412	2	314051	7307150	118585	0	0	0	0	0	0	0	0	1830461	1813552	918408	940006	766254	364648	452449	221372	0	0	0	0	0	0	0	81209	37376	0	0	0	0	0	0	0	0	0	0	0	0
sample-175	egg	SSA1-SG1	Kyanagolo	f5	Non-outbreaking	Old	S00.16989	E031.83412	2	48665	1077054	6971	0	0	0	0	0	0	0	0	266021	296083	155414	142844	92603	49925	47937	26227	0	0	0	0	0	0	0	4495	2476	0	0	0	0	0	0	0	0	0	0	0	0
sample-189	egg	SSA1-SG1	Kyanagolo	f5	Non-outbreaking	Old	S00.16989	E031.83412	2	58510	1336391	8204	0	0	0	0	0	0	0	0	403482	452009	94758	88931	158054	39077	78159	21921	0	0	0	0	0	0	0	5402	2802	0	0	0	0	0	0	0	0	0	0	0	0
sample-26	egg	SSA1-SG1	Kyanagolo	f5	Non-outbreaking	Old	S00.16989	E031.83412	2	11466	854161	4138	0	0	0	0	0	0	0	0	273018	237075	71434	95224	78035	19250	59766	20273	86	0	0	0	0	0	0	3245	893	0	0	0	0	0	0	0	0	0	0	0	0
sample-54	egg	SSA1-SG1	Kyanagolo	f5	Non-outbreaking	Old	S00.16989	E031.83412	2	43214	1386458	19626	0	0	0	0	0	0	0	0	349332	255762	247384	292445	40240	79324	60168	61803	0	0	0	0	0	0	0	14099	5527	0	0	0	0	0	0	0	0	0	0	0	0
sample-68	egg	SSA1-SG1	Kyanagolo	f5	Non-outbreaking	Old	S00.16989	E031.83412	2	74985	975443	17125	0	0	0	0	0	0	0	0	280467	213907	117394	150972	67453	45813	62597	36840	0	0	0	0	0	0	0	12366	4759	0	0	0	0	0	0	0	0	0	0	0	0
sample-82	egg	SSA1-SG1	Kyanagolo	f5	Non-outbreaking	Old	S00.16989	E031.83412	9	32855	691564	5223	0	0	0	0	0	0	0	0	268326	75144	190504	54978	11430	60869	23796	6517	0	0	0	84	0	0	186	0	0	0	2497	0	0	0	0	0	0	0	0	0	0
sample-205	Pupae	SSA1-SG1	Masaka	f6	Non-outbreaking	Old	S00.33294	E031.70984	12	19658	484559	6325	0	0	0	0	0	0	0	0	103717	66456	49479	79017	61248	46947	43673	34022	0	0	0	0	0	0	0	2849	934	0	0	0	0	0	0	0	0	0	0	0	0
sample-95L2	egg	SSA1-SG1	Masaka	f6	Non-outbreaking	Old	S00.33294	E031.70984	3	24	9498	558	0	0	0	0	0	0	0	0	1883	2150	1891	1726	674	667	261	246	0	0	0	0	0	0	0	0	0	0	0	0	0	144	244	170	0	0	0	0	0
sample-12	egg	SSA1-SG1	Masaka	f6	Non-outbreaking	Old	S00.33294	E031.70984	2	30299	189709	2408	0	0	0	0	0	0	0	0	58568	44767	33303	43054	2258	2043	3264	2452	0	0	0	0	0	0	0	1621	787	0	0	0	0	0	0	0	0	0	0	0	0
sample-133	egg	SSA1-SG1	Masaka	f6	Non-outbreaking	Old	S00.33294	E031.70984	8	88345	641736	56121	0	0	0	0	0	0	0	0	174914	198411	82542	67236	61100	17388	31862	8283	0	0	0	0	0	0	0	0	0	0	0	0	0	5557	16223	17793	6969	5063	2824	1061	631
sample-174	egg	SSA1-SG1	Masaka	f6	Non-outbreaking	Old	S00.33294	E031.70984	2	79436	1000158	17495	0	0	0	0	0	0	0	0	299220	166889	95280	172996	87425	48922	81370	48056	0	0	0	0	0	0	0	13608	3887	0	0	0	0	0	0	0	0	0	0	0	0
sample-94	egg	SSA1-SG1	Masaka	f6	Non-outbreaking	Old	S00.33294	E031.70984	2	6803	456511	12367	0	0	0	0	0	0	0	0	74544	137976	153374	83622	2774	3083	558	580	0	0	0	0	0	0	0	6907	5460	0	0	0	0	0	0	0	0	0	0	0	0
sample-188	egg	SSA1-SG1	Masaka	f6	Non-outbreaking	Old	S00.33294	E031.70984	2	57597	665216	7457	0	0	0	0	0	0	0	0	218751	131213	57145	96642	48829	21772	62835	28029	0	0	0	0	0	0	0	5899	1558	0	0	0	0	0	0	0	0	0	0	0	0
sample-81L2	egg	SSA1-SG1	Masaka	f6	Non-outbreaking	Old	S00.33294	E031.70984	0	3212	29926	0	0	0	0	0	0	0	0	0	8256	11311	2000	1558	3733	702	1992	374	0	0	0	0	0	0	0	0	0	0	0	0	0	0	0	0	0	0	0	0	0
sample-119	egg	SSA1-SG1	Masaka	f6	Non-outbreaking	Old	S00.33294	E031.70984	0	2599	700	0	0	0	0	0	0	0	0	0	115	0	585	0	0	0	0	0	0	0	0	0	0	0	0	0	0	0	0	0	0	0	0	0	0	0	0	0	0
sample-202	egg	SSA1-SG1	Masaka	f6	Non-outbreaking	Old	S00.33294	E031.70984	5	28911	375513	6348	0	0	0	0	0	0	0	0	118260	68486	60773	104513	7716	7071	4589	4105	0	0	0	0	0	0	0	3035	865	0	0	0	0	545	1397	506	0	0	0	0	0
sample-81L1	egg	SSA1-SG1	Masaka	f6	Non-outbreaking	Old	S00.33294	E031.70984	1	0	118390	373	0	0	0	0	0	0	0	0	26401	25905	18185	18812	8702	6133	8375	5877	0	0	0	0	0	0	0	373	0	0	0	0	0	0	0	0	0	0	0	0	0
sample-95L1	egg	SSA1-SG1	Masaka	f6	Non-outbreaking	Old	S00.33294	E031.70984	3	25688	19165	32002	0	0	0	0	0	0	0	0	3553	5402	3520	2610	1516	967	1000	597	0	0	0	0	0	0	0	0	0	0	9492	11622	0	0	0	0	0	0	0	0	0
sample-132	egg	SSA1-SG1	Kiwesi	f8	Non-outbreaking	Old	S00.66515	E031.53927	17	285439	547380	9594	0	0	0	0	0	0	0	0	211892	100295	26358	48515	56211	19401	68426	16282	0	0	0	119	0	89	0	2866	774	0	0	0	0	345	1254	827	302	388	0	0	0
sample-187	egg	SSA1-SG1	Kiwesi	f8	Non-outbreaking	Old	S00.66515	E031.53927	2	9416	967824	11123	0	0	0	0	0	0	0	0	506313	263098	44660	130476	13207	1325	7467	1278	0	0	0	0	0	0	0	9602	1521	0	0	0	0	0	0	0	0	0	0	0	0
sample-80	egg	SSA1-SG1	Kiwesi	f8	Non-outbreaking	Old	S00.66515	E031.53927	2	32685	585418	11833	0	0	0	0	0	0	0	0	124877	218403	142743	82459	8431	5464	1891	1150	0	0	0	0	0	0	0	6217	5616	0	0	0	0	0	0	0	0	0	0	0	0
sample-11	egg	SSA1-SG1	Kiwesi	f8	Non-outbreaking	Old	S00.66515	E031.53927	2	118037	317766	18121	0	0	0	0	0	0	0	0	65846	70914	58584	54208	20176	16687	16776	14472	103	0	0	0	0	0	0	11919	6202	0	0	0	0	0	0	0	0	0	0	0	0
sample-118	egg	SSA1-SG1	Kiwesi	f8	Non-outbreaking	Old	S00.66515	E031.53927	2	68706	97141	2590	0	0	0	0	0	0	0	0	22084	12555	12056	20970	7817	7848	7212	6599	0	0	0	0	0	0	0	2158	432	0	0	0	0	0	0	0	0	0	0	0	0
sample-173	egg	SSA1-SG1	Kiwesi	f8	Non-outbreaking	Old	S00.66515	E031.53927	2	5419	320834	5142	0	0	0	0	0	0	0	0	79361	80403	44459	43706	29716	16764	16925	9500	0	0	0	0	0	0	0	3349	1793	0	0	0	0	0	0	0	0	0	0	0	0
sample-25	egg	SSA1-SG1	Kiwesi	f8	Non-outbreaking	Old	S00.66515	E031.53927	2	92666	2768868	17175	0	0	0	0	0	0	0	0	859602	887629	194813	161865	300214	63146	256476	44876	247	0	0	0	0	0	0	10695	6480	0	0	0	0	0	0	0	0	0	0	0	0
sample-39	egg	SSA1-SG1	Kiwesi	f8	Non-outbreaking	Old	S00.66515	E031.53927	2	40043	714931	8436	0	0	0	0	0	0	0	0	156407	199265	110649	85138	65946	36579	39513	21434	0	0	0	0	0	0	0	5195	3241	0	0	0	0	0	0	0	0	0	0	0	0
sample-53L1	egg	SSA1-SG1	Kiwesi	f8	Non-outbreaking	Old	S00.66515	E031.53927	14	49	333927	60967	0	0	0	0	0	0	0	0	8947	8946	123865	124013	2291	31759	2288	31818	0	0	0	82	59	2154	2136	0	0	0	283	0	272	0	0	0	0	0	0	0	0
sample-66	egg	SSA1-SG1	Kiwesi	f8	Non-outbreaking	Old	S00.66515	E031.53927	2	28417	1555211	11921	0	0	0	0	0	0	0	0	342615	371960	237712	206754	147422	77121	112802	58825	0	0	0	0	0	0	0	7613	4308	0	0	0	0	0	0	0	0	0	0	0	0
sample-67	egg	SSA1-SG1	Kiwesi	f8	Non-outbreaking	Old	S00.66515	E031.53927	2	36445	810645	9913	0	0	0	0	0	0	0	0	183730	225509	125189	107224	62237	34677	45078	27001	0	0	0	0	0	0	0	6472	3441	0	0	0	0	0	0	0	0	0	0	0	0
[truncated: 26 more columns]
